# Supplementary material for: Antibacterial silver-doped phosphate-based glasses prepared by coacervation
Source: Royal Society of Chemistry journal article supplement (doi:10.1039/c9tb02195g), 2019-01-01

Supplementary information

**Antibacterial silver-doped phosphate-based glasses prepared by coacervation**

Benjamin A. Kyffin,<sup>a</sup> Farzad Foroutan,<sup>a</sup> Farah N. S. Raja,<sup>b</sup> Richard A. Martin,<sup>b</sup> David M. Pickup,<sup>c</sup>  
Spencer E. Taylor,<sup>a</sup> Daniela Carta<sup>a,\*</sup>

<sup>a</sup>*Department of Chemistry, University of Surrey, GU2 7XH, Guildford, UK.*

<sup>b</sup>*School of Engineering & Applied Science and Aston Institute for Materials Research, Aston University, Aston Triangle, Birmingham, B4 7ET, UK.*

<sup>c</sup>*School of Physical Sciences, Ingram Building, University of Kent, Canterbury, Kent, CT2 7NH, UK.*

*\*Corresponding author: Dr D. Carta, Department of Chemistry, University of Surrey, GU2 7XH, Guildford, UK. Email: d.cart@surrey.ac.uk*

**Table S1:** Compositions of the glasses expressed in terms of element weight% based on EDX measurements.

| Sample    | Elemental composition (weight%) |       |      |       |       |
|-----------|---------------------------------|-------|------|-------|-------|
|           | P                               | Ca    | Na   | Ag    | O     |
| G-RT      | 27.70                           | 14.87 | 5.23 | -     | 52.17 |
| G-Ag1-RT  | 24.13                           | 13.63 | 4.60 | 1.97  | 55.67 |
| G-Ag3-RT  | 24.87                           | 14.07 | 4.43 | 6.00  | 50.67 |
| G-Ag5-RT  | 23.73                           | 13.53 | 3.37 | 8.43  | 50.93 |
| G-Ag9-RT  | 20.43                           | 12.20 | 2.67 | 14.20 | 50.50 |
| G-Ag14-RT | 22.50                           | 11.00 | 2.00 | 22.97 | 41.50 |

**Table S2:** Compositions of the glasses expressed in terms of oxide weight% based on EDX measurements.

| Sample    | Oxide composition (weight%)   |       |                   |                   |                  |
|-----------|-------------------------------|-------|-------------------|-------------------|------------------|
|           | P <sub>2</sub> O <sub>5</sub> | CaO   | Na <sub>2</sub> O | Ag <sub>2</sub> O | H <sub>2</sub> O |
| G-RT      | 62.81                         | 20.58 | 6.98              | 0.00              | 9.63             |
| G-Ag1-RT  | 54.12                         | 18.67 | 6.07              | 2.07              | 19.08            |
| G-Ag3-RT  | 56.18                         | 19.41 | 5.89              | 6.36              | 12.16            |
| G-Ag5-RT  | 53.50                         | 18.63 | 4.46              | 8.91              | 14.50            |
| G-Ag9-RT  | 45.82                         | 16.71 | 3.52              | 14.91             | 19.02            |
| G-Ag14-RT | 51.21                         | 15.29 | 2.68              | 24.50             | 6.32             |

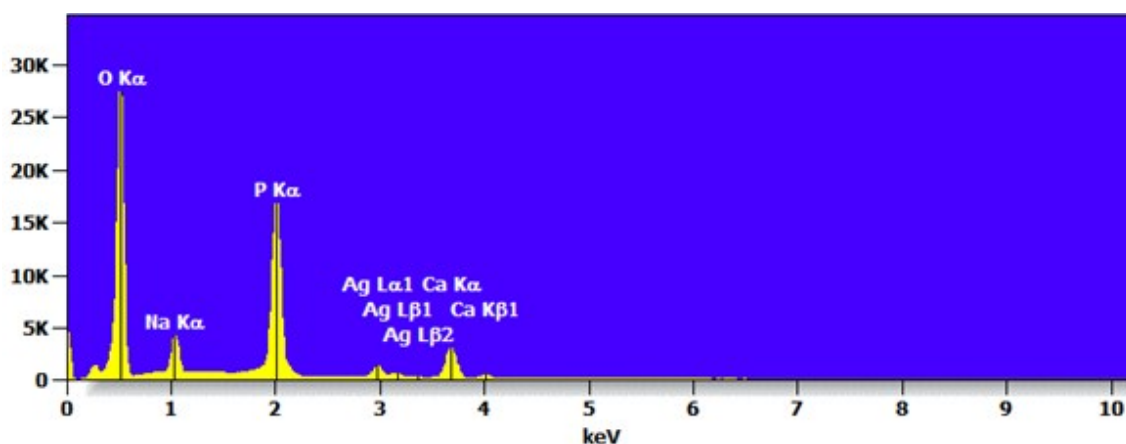

**Figure S1:** Representative EDX spectrum of a silver doped glass showing the spectral lines used to calculate the compositions of the glasses.

**Table S3:** Raman spectral bands ( $\text{cm}^{-1}$ ) from of glasses dried at room temperature and calcined at 300 and 400 °C as a function of %mol  $\text{Ag}_2\text{O}$  with assignments.

| <b>G-RT</b>  | <b>G-Ag1-RT</b>  | <b>G-Ag3-RT</b>  | <b>G-Ag5-RT</b>  | <b>G-Ag9-RT</b>  | <b>G-Ag14-RT</b>  | <b>Assignment</b>                           |
|--------------|------------------|------------------|------------------|------------------|-------------------|---------------------------------------------|
| 700          | 697              | 697              | 697              | 695              | 695               | $\nu_{\text{sym}}(\text{P-O}_b)$ , A        |
| 893          | 892              | 892              | 890              | 891              | 890               | $\nu_{\text{asym}}(\text{P-O}_b)$ , A       |
| 1057         | 1053             | 1053             | 1053             | 1052             | 1052              | $\nu_{\text{sym}}(\text{PO}_3)^{2-}_t$ , A  |
| 1170         | 1168             | 1167             | 1167             | 1164             | 1165              | $\nu_{\text{sym}}(\text{P-O}_t)$ , A        |
| 1253         | 1252             | 1250             | 1249             | 1244             | 1244              | $\nu_{\text{asym}}(\text{P-O}_t)$ , A       |
| <b>G-300</b> | <b>G-Ag1-300</b> | <b>G-Ag3-300</b> | <b>G-Ag5-300</b> | <b>G-Ag9-300</b> | <b>G-Ag14-300</b> |                                             |
| 699          | 697              | 699              | 705              | 700              | 701               | $\nu_{\text{sym}}(\text{P-O}_b)$ , A        |
| 892          | 864              | 894              | 896              | 896              | 896               | $\nu_{\text{asym}}(\text{P-O}_b)$ , A       |
| 1058         | 1058             | 1057             | 1056             | 1053             | 1053              | $\nu_{\text{sym}}(\text{PO}_3)^{2-}_t$ , A  |
| 1169         | 1169             | 1164             | 1161             | 1162             | 1159              | $\nu_{\text{sym}}(\text{P-O}_t)$ , A        |
| 1250         | 1248             | 1245             | 1242             | 1241             | 1236              | $\nu_{\text{asym}}(\text{P-O}_t)$ , A       |
| <b>G-400</b> | <b>G-Ag1-400</b> | <b>G-Ag3-400</b> | <b>G-Ag5-400</b> | <b>G-Ag9-400</b> | <b>G-Ag14-400</b> |                                             |
| 692          | 694              | 691              | 684              |                  |                   | $\nu_{\text{sym}}(\text{P-O}_b)$ , A        |
|              |                  | 719              | 719              | 719              | 717               | $\nu_{\text{sym}}(\text{P-O}_b)$ , C        |
|              |                  | 740              | 741              | 742              | 741               | $\nu_{\text{sym}}(\text{P-O}_b)$ , C        |
|              |                  | 778              | 778              | 779              | 775               | $\nu_{\text{sym}}(\text{P-O}_b)$ , C        |
| 1044         | 1059             | 1042             | 1043             | 1048             | 1044              | $\nu_{\text{sym}}(\text{PO}_3)^{2-}_t$ , A  |
| 1174         | 1173             | 1173             | 1174             | 1175             | 1173              | $\nu_{\text{sym}}(\text{P-O}_t)$ , A        |
|              |                  | 1221             | 1221             | 1221             | 1220              | $\nu_{\text{asym}}(\text{PO}_3)^{2-}_t$ , C |
| 1259         | 1253             | 1252             | 1251             | 1249             | 1245              | $\nu_{\text{asym}}(\text{P-O}_t)$ , A       |

A = Amorphous phase. C = Crystalline phase.

### Compositional mol% of Ag<sub>2</sub>O in G-Ag1-RT

The weight% elemental composition as shown in Table S1 was used to calculate the compositional mol% of each atom shown in Table 2. The calculation for mol% Ag<sub>2</sub>O for G-Ag1-RT is shown below.

In order to calculate the glass composition, the weight% of each element was obtained from EDX:

$$\text{Ag weight\%} = 1.97$$

This was then used to calculate the oxide weight percentage taking into account the number of each element in its respective oxide form:

$$\text{Ag}_2\text{O weight\%} = 2.07$$

From this the mole% of each oxide can be calculated, however as the excess oxygen is assumed to exist as water and not part of the glass network, the mole% should be calculated excluding H<sub>2</sub>O:

$$\text{Ag}_2\text{O mol\%} = \underline{1.09}$$

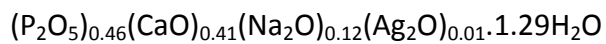

Supplement: c9tb02195g1.pdf [file c9tb02195g1.pdf]
